# Supplementary material for: Mucus polymer concentration and in vivo adaptation converge to define the antibiotic response of Pseudomonas aeruginosa during chronic lung infection
Source: PubMed Central journal article supplement (PMC11237767; doi:10.1128/mbio.03451-23), 2024-04-23
Supplement: mbio.03451-23-s0001.pdf [file mbio.03451-23-s0001.pdf]

## Supplemental Figures

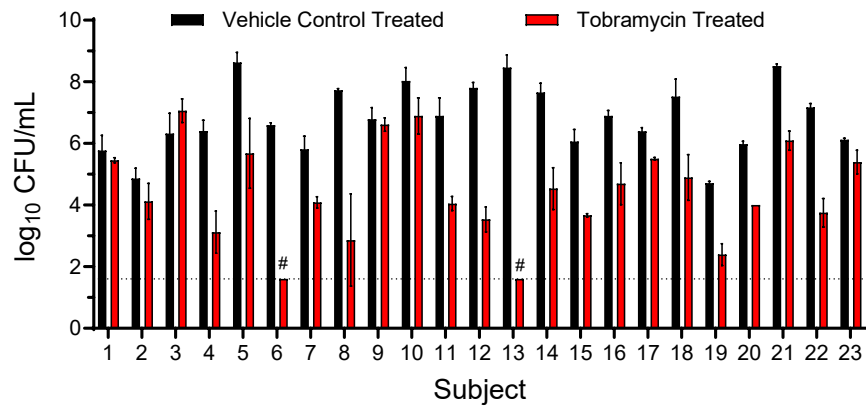

**Figure S1. Ex vivo treated sputum CFU.** CFU recovered on *Pseudomonas* isolation agar (PIA) from  $n \geq 2$  sputum aliquots (mean  $\pm$  SD) after 24 h incubation with vehicle control (PBS) or tobramycin (300  $\mu$ g/mL). # indicates no recovered *P. aeruginosa* after antibiotic treatment (limit of detection,  $4 \times 10^1$  CFU/mL).

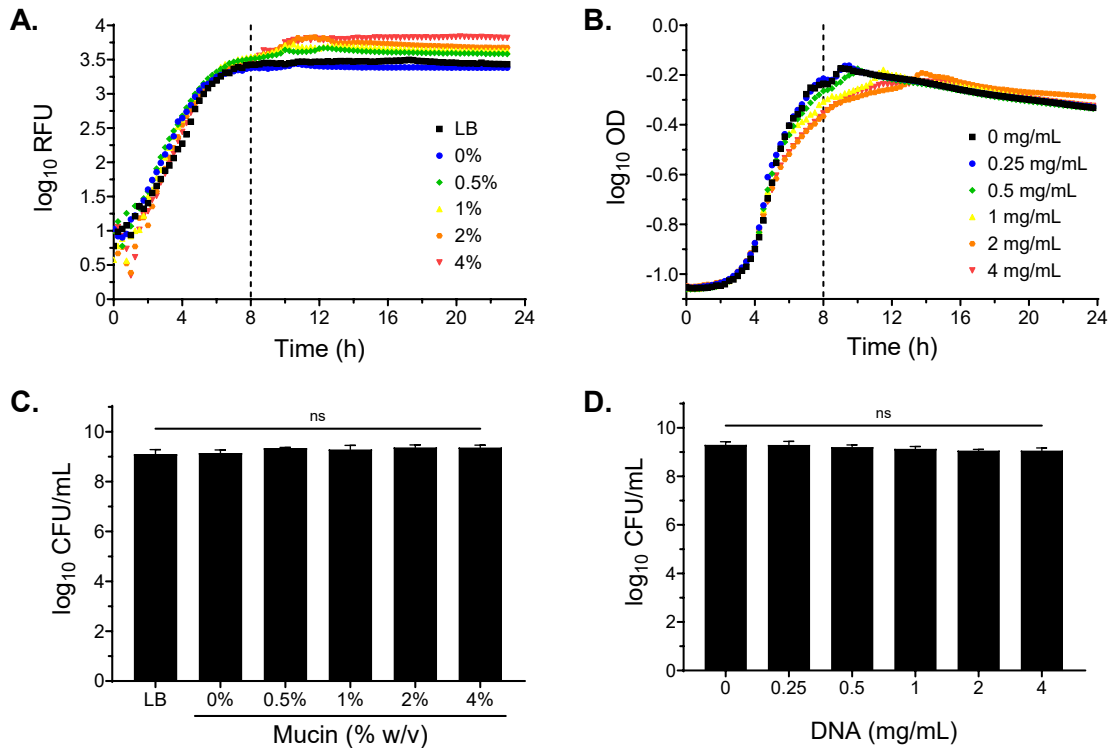

**Figure S2. Mucin and eDNA do not affect growth kinetics of *P. aeruginosa*.** (A) Growth curve of mPAO1 expressing *gfp*, in LB or SCFM2 with 0%, 0.5%, 1%, 2%, and 4% w/v mucin and no eDNA for 24 h. (B) WT mPAO1 growth curve in SCFM2 lacking mucin, with increasing concentrations of HMW eDNA. Fluorescence (483 / 535 nm) (A) or absorbance (600 nm) (B) measurements were taken every 15 min using a Tecan Infinite 200 PRO plate reader (Tecan Group Ltd., AG, Switzerland). Data are representative of the mean from  $n = 3$  biological replicates in technical duplicate. (C and D) CFU of mPAO1 after 8 h of growth in SCFM2 with (C) increasing mucin or (D) increasing eDNA concentration. Statistical analysis performed by one-way ANOVA with Tukey's multiple comparison correction. ns indicates not significant ( $p$ -value > 0.05).

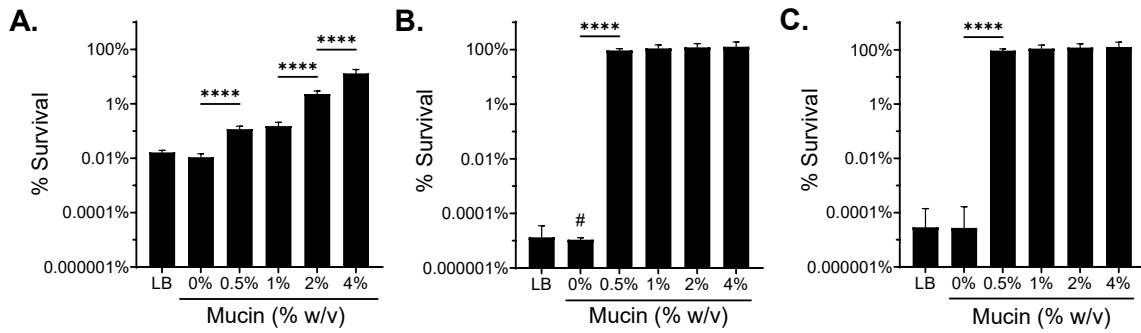

**Figure S3. *P. aeruginosa* exhibits mucin concentration-dependent tolerance to multiple antibiotic classes.** Survival of mPAO1 cultured in LB and SCFM2 media with increasing % w/v mucin and treated with **(A)** 300 µg/mL ciprofloxacin, **(B)** 40 µg/mL colistin, or **(C)** 40 µg/mL polymyxin B for 24 h. Mean ± SD of  $n \geq 3$  biological replicates. Statistical differences were analyzed using one-way ANOVA with Tukey's multiple comparison correction. \*\*\*\* $p < 0.0001$ . # indicates no recovered *P. aeruginosa* after antibiotic treatment (limit of detection,  $10^2$  CFU/mL).

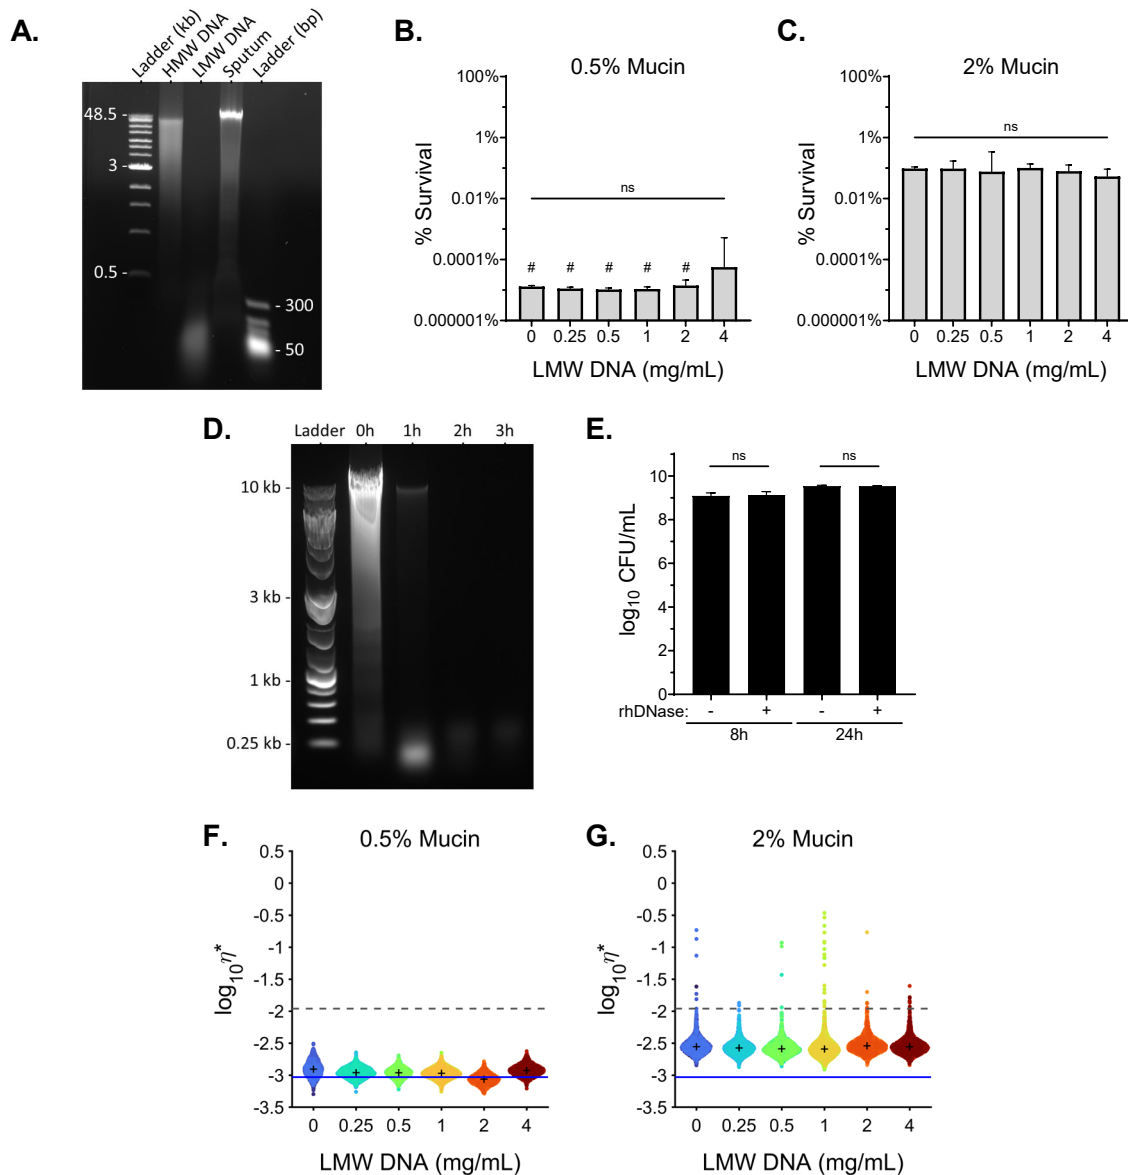

**Figure S4. High molecular weight eDNA is necessary to impart tobramycin tolerance. (A)** DNA gel electrophoresis of salmon sperm DNA from different commercial sources compared to a representative sputum from a CF subject. **(B-C)** % survival of mPAO1 after treatment with 300 µg/mL tobramycin in SCFM2 with **(B)** 0.5% or **(C)** 2% w/v mucin and increasing concentrations of LMW eDNA. Statistical differences were determined by one-way ANOVA. **(D)** Gel electrophoresis of SCFM2 containing 2% mucin and 1 mg/mL HMW DNA treated with rhDNase (3 µg/mL) for 0, 1, 2 or 3 h. **(E)** Effect of rhDNase (3 µg/mL) on the growth of mPAO1 in 2% mucin SCFM2 after

8 and 24 h. Mean  $\pm$  SD of  $n \geq 3$  biological replicates. ns indicates not significant ( $p$ -value  $> 0.05$ ). Probability distribution of each microbead  $\eta^*$  for increasing LMW eDNA concentrations in **(F)** 0.5% or **(G)** 2% w/v mucin SCFM2. Data are representative of  $n \geq 3$  technical replicates. The viscosity of water is indicated by a solid blue line and the complex viscosity at which mucus entangles and becomes gel-like (42) is indicated by a gray dashed line. + indicates the median complex viscosity for each sample.

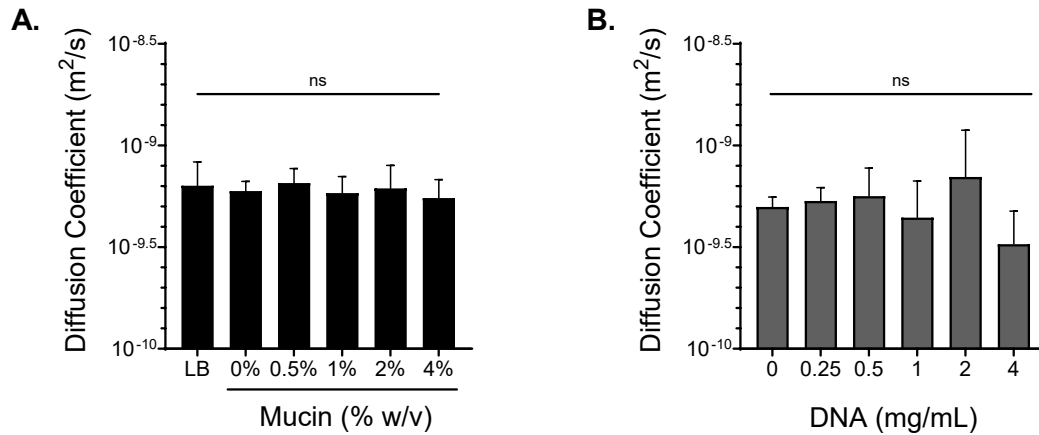

**Figure S5. Antibiotic diffusion was not affected by polymer concentration.** Diffusion rate of Texas Red conjugated tobramycin through **(A)** LB and SCFM2 with increasing mucin concentrations and **(B)** 0.5% w/v mucin SCFM2 with increasing concentrations of eDNA. Data are presented as the mean  $\pm$  SD of  $n = 3$  replicates. Statistical analysis was performed by one-way ANOVA. ns indicates not significant ( $p$ -value  $> 0.05$ ).

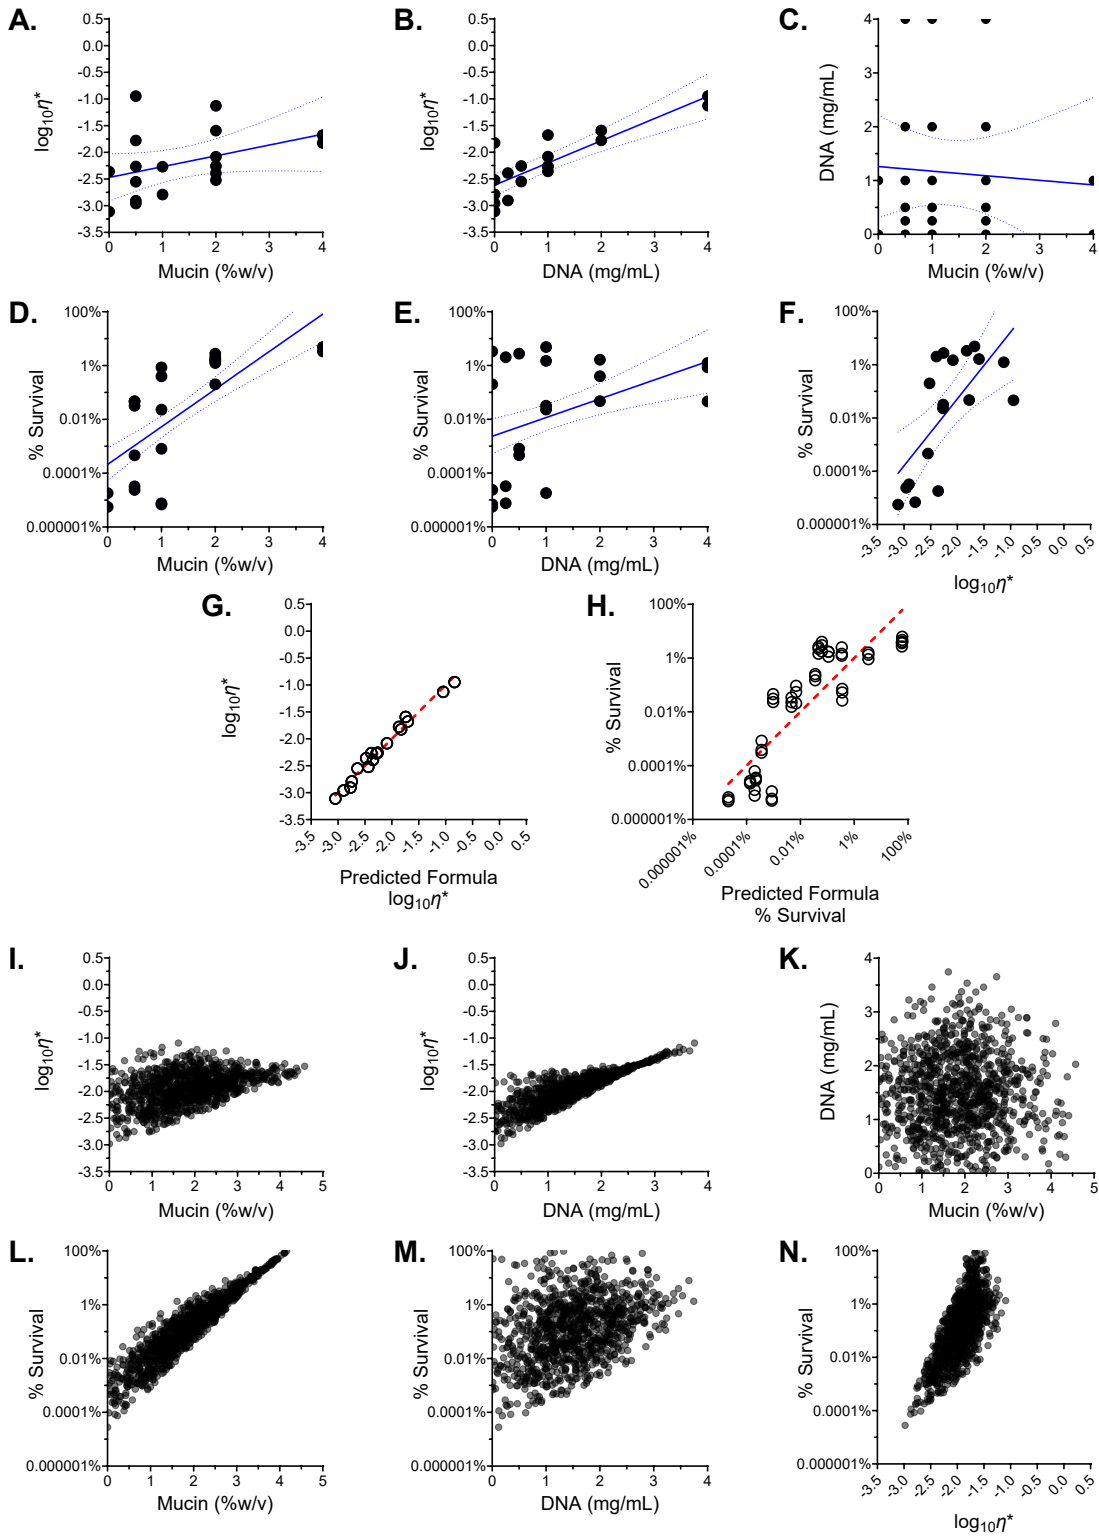

**Figure S6. PLS regression model and simulation. (A-F)** Linear trend and 95% confidence intervals of the relationship between the outcome variables (tobramycin survival and

viscoelasticity) and input variables (mucin and eDNA concentration). **(G-H)** Three-factor model performance comparing the actual versus model predictions for **(G)** viscoelasticity and **(H)** antibiotic survival. **(I-N)** Individual biplot of 1000 simulated runs through the interactive model demonstrating the relationship between the outcome variables (tobramycin survival and viscoelasticity) and input variables (mucin and eDNA concentration).



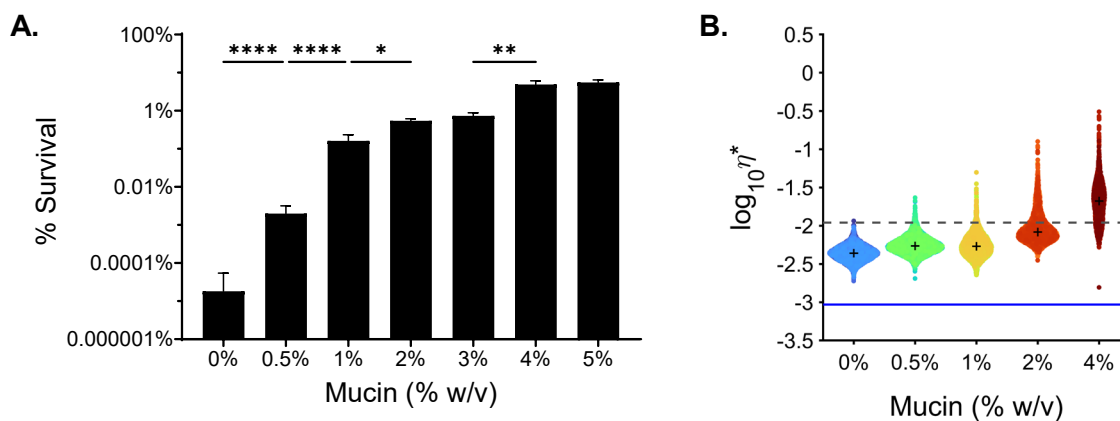

**Figure S7. Antibiotic survival and complex viscosity of final media composition. (A)** Tobramycin survival of mPAO1, and **(B)** complex viscosity of SCFM2 containing 1 mg/mL HMW eDNA and increasing % w/v mucin. Statistical differences were determined using one-way ANOVA with Tukey's multiple comparison correction. \* $p < 0.05$ , \*\* $p < 0.01$ , \*\*\*\* $p < 0.0001$ . Data represent the mean  $\pm$  SD of  $n \geq 3$  biological replicates. The viscosity of water is indicated by the solid blue line, and the complex viscosity at which mucus entangles and becomes gel-like (42) is indicated by the dashed gray line. + indicates the median for each sample.

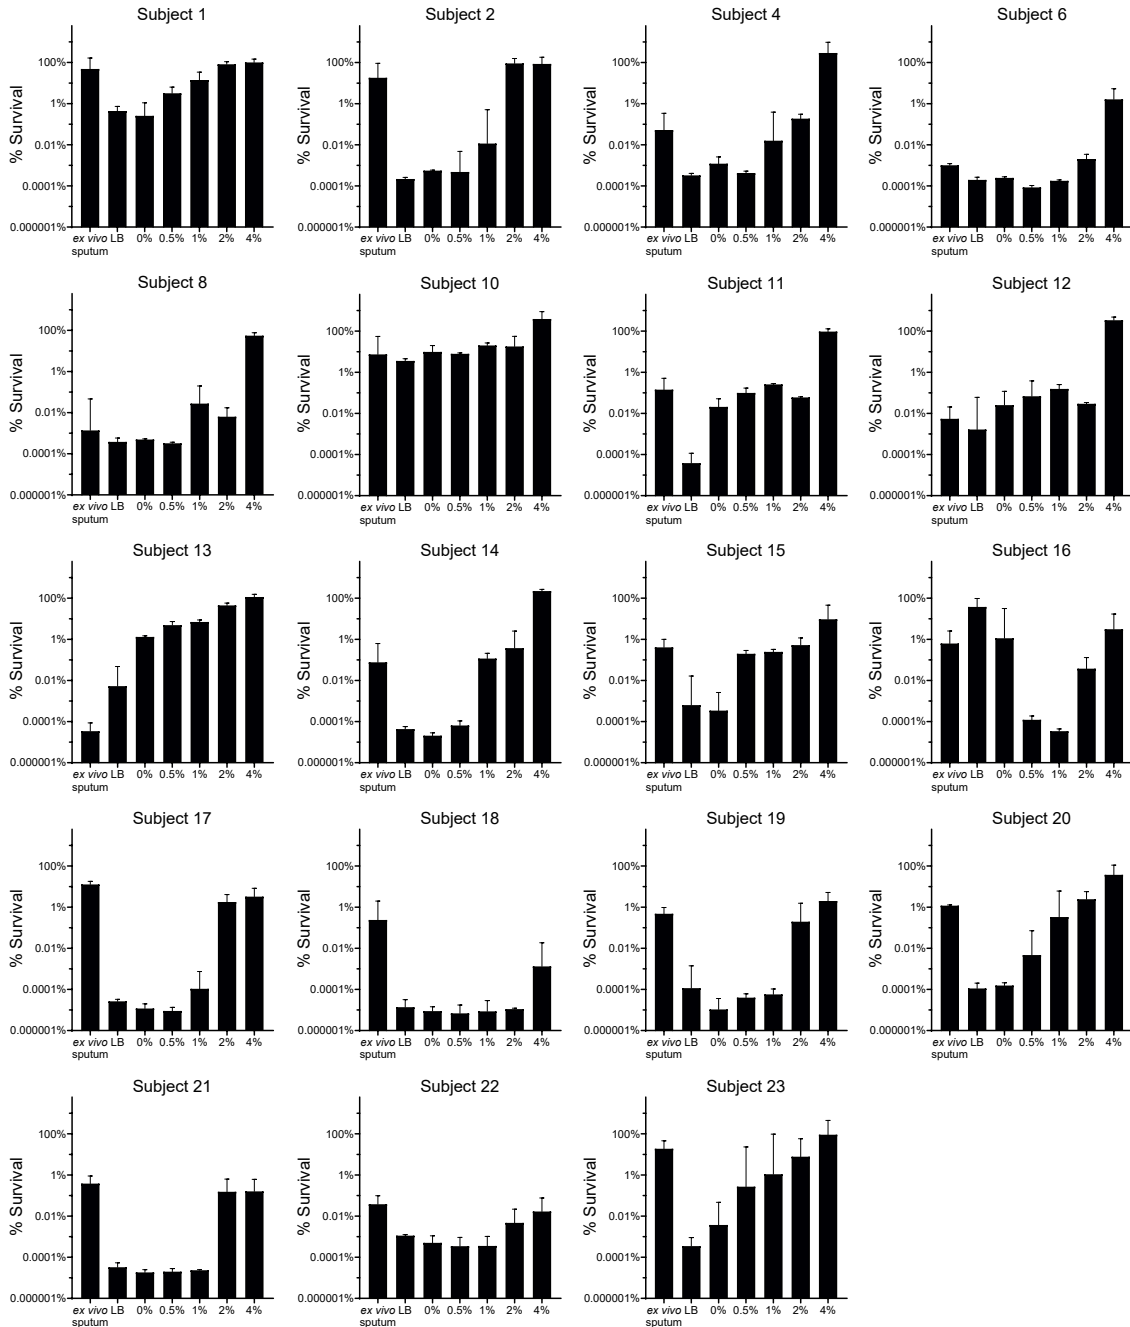

**Figure S8. *In vitro* mucin concentration-dependent antibiotic survival of clinical populations.** Percent survival of *ex vivo* treated sputum and *P. aeruginosa* populations recovered from each subject mock treated sputum evaluated *in vitro* for tobramycin tolerance in LB and SCFM2 containing 1 mg/mL HMW eDNA with increasing %w/v mucin. Hyperresistant sputum populations (MIC  $\geq$  80) were excluded. Data are representative of  $n = 3$  independent replicates

and plotted as mean  $\pm$  SD. # indicates no recovered *P. aeruginosa* after tobramycin treatment (limit of detection,  $10^2$  CFU/mL).

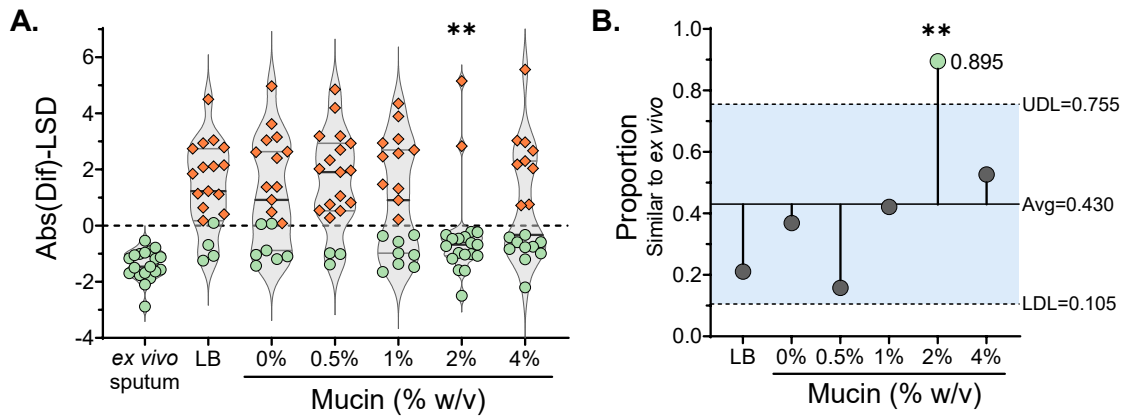

**Figure S9. *In vitro* 2% mucin SCFM2 recapitulates *ex vivo* sputum antibiotic efficacy. (A)**

Comparison of the absolute difference between sample means minus Fisher's least significant difference (Abs (Dif) - LSD). Values > 0 (orange circles) were considered different from *ex vivo* conditions at Dunnett's post-test  $p$ -values < 0.05. **(B)** Proportion of *in vitro* cultures similar to *ex vivo* sputum tobramycin survival. Conditions that were disproportionate compared to the overall mean (43%) were identified via analysis of means for proportions ( $\alpha = 0.01$ ). The 2% mucin condition was the only condition above the upper decision line (UDL), indicating a difference from the mean across all conditions. \*\* $p < 0.01$ .
